# Supplementary material
Source: Springer Nature journal article supplement (https://www.springermedizin.de/resource/supplementary/12885_2010_2707_MOESM10_ESM.pdf/9461784)

- ER+
- PR+
- Her2+
- Grade 1 & 2
- Centre 1
- Centre 2
- Centre 3
- Centre 4

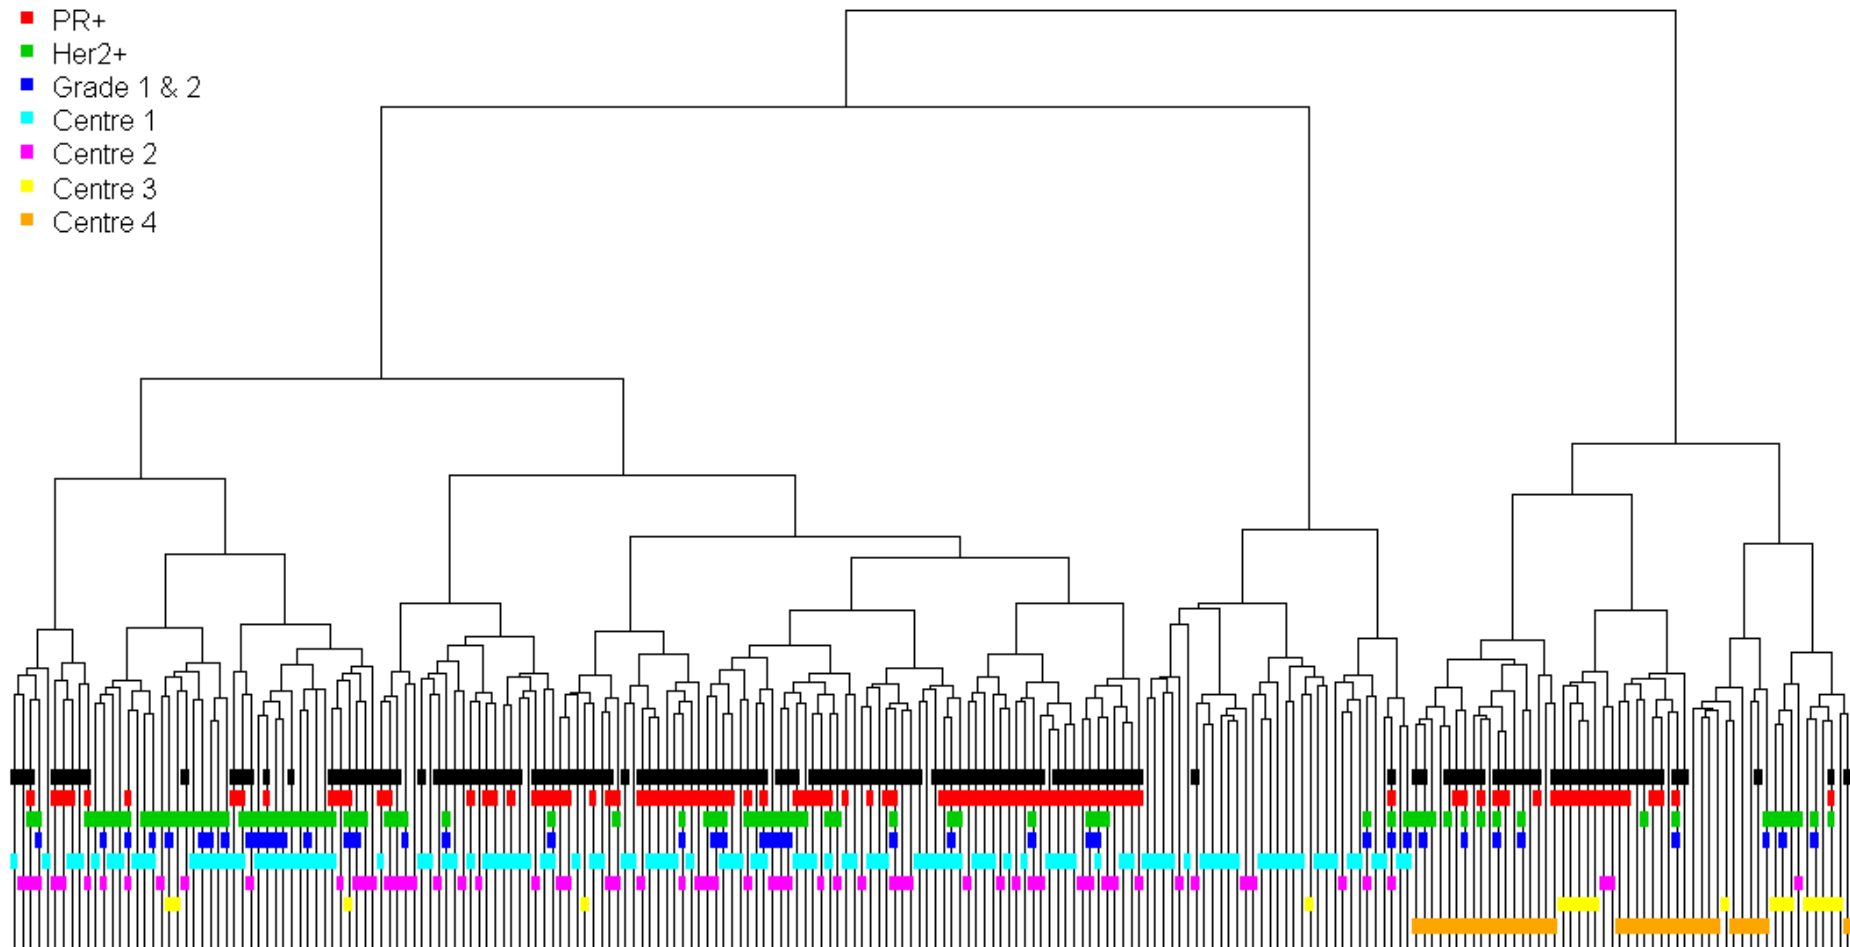

Supplement: MOESM10 [file 9461784]
